# Supplementary material for: Seasonal Effect on Bacterial Communities Associated with the Rhizospheres of Polhillia, Wiborgia and Wiborgiella Species in the Cape Fynbos, South Africa
Source: MDPI journal article supplement (doi:10.3390/microorganisms10101992), 2022-10-09
Supplement: s1 [file s1]

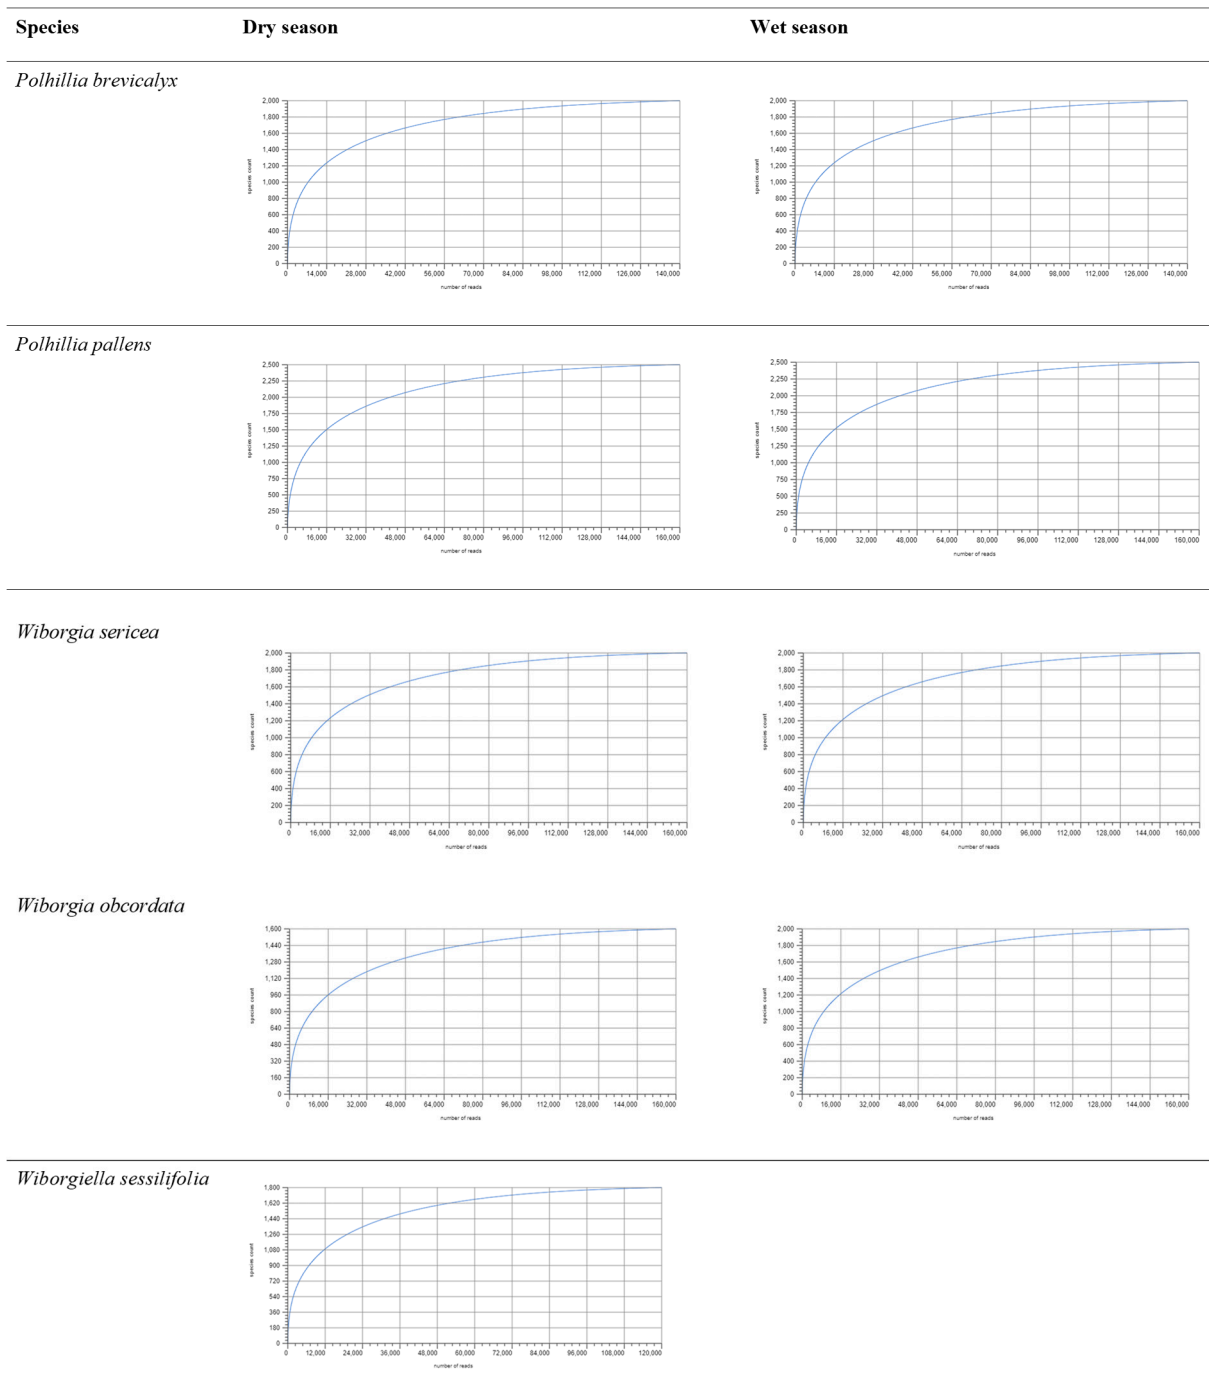

Figure S1: Rarefaction analysis bacterial species associated with *Polhillia brevicalyx*, *Polhillia pallens*, *Wiborgia sericea*, *Wiborgia obcordata* and *Wiborgiella sessilifolia* rhizosphere soil.

**Table S1:** Information about the number and quality of sequences generated

| Season     | Plant species                  | Sample site           | Total bases (bp)* | Raw reads (bp)* | GC (%) | Q20 (%) | Q30 (%) |
|------------|--------------------------------|-----------------------|-------------------|-----------------|--------|---------|---------|
| <b>Dry</b> |                                |                       |                   |                 |        |         |         |
|            | <i>Polhillia brevicealyx</i>   | Ghwarriekop farm      | 4444959           | 11820           | 57±4   | 93.13   | 85.84   |
|            | <i>Polhillia pallens</i>       | Witkoppies            | 5537882           | 14904           | 58±5   | 92.47   | 84.84   |
|            | <i>Wiborgia sericea</i>        | Traveller's Rest Farm | 5180741           | 14305           | 58±5   | 91.97   | 84.01   |
|            | <i>Wiborgia obcordata</i>      | Bushmans kloof        | 4882646           | 13485           | 58±5   | 91.9    | 83.92   |
|            | <i>Wiborgiella sesilifolia</i> | Bredasdorp            | 4521971           | 12006           | 57±3   | 92.1    | 84.03   |
| <b>Wet</b> |                                |                       |                   |                 |        |         |         |
|            | <i>Polhillia brevicealyx</i>   | Ghwarriekop farm      | 5072395           | 13536           | 57±4   | 92.69   | 85.15   |
|            | <i>Polhillia pallens</i>       | Witkoppies            | 5792049           | 15764           | 58±5   | 92.53   | 84.94   |
|            | <i>Wiborgia sericea</i>        | Traveller's Rest Farm | 5459978           | 14819           | 58±5   | 92.77   | 83.31   |
|            | <i>Wiborgia obcordata</i>      | Bushmans kloof        | 5771647           | 15164           | 58±5   | 92.71   | 85.15   |
